# Supplementary material for: Pure and Zn-doped Pt clusters go flat and upright on MgO(100)
Source: Royal Society of Chemistry journal article supplement (doi:10.1039/c4cp01877j), 2014-01-01
Supplement: c4cp01877j1.pdf [file c4cp01877j1.pdf]

## Pure and Zn-Doped Pt Clusters Go Flat and Upright on MgO(100)

Lu Shen,<sup>1</sup> Jonny Dadras,<sup>1</sup> Anastassia N. Alexandrova,<sup>1,2\*</sup>

<sup>1</sup>*Department of Chemistry and Biochemistry, University of California, Los Angeles, Los Angeles, California, 90095-1569.*

<sup>2</sup>*California NanoSystems Institute, 570 Westwood Plaza, Building 114, Los Angeles, CA 90095.*

### Supporting Information

**Table S1.** Relative energies (in eV) of the lowest energy isomers of  $\text{Pt}_5^-$  and  $\text{Pt}_4\text{Zn}^-$  in the gas phase calculated with various levels of theory. Showing that the PW-DFT results are reliable and produce results consistent with different levels of theory. Labels are as in the main text. Black – UTPSSh/aug-cc-pvTZ+pp, red – MP2/aug-cc-pvTZ. Note that all structures with relative energies computed were found to have fairly clean single-reference wave functions with the HF Slater contributing 0.9 or higher into the CASSCF(m,n)/LANL2DZ expansions. Thus, single reference methods are reliable.\*

|                    | $\text{Pt}_5$    | $\text{Pt}_5^-$  | $\text{Pt}_4\text{Zn}$ | $\text{Pt}_4\text{Zn}^-$ |
|--------------------|------------------|------------------|------------------------|--------------------------|
| $\text{D}_{3h}, 5$ | 0<br>0           | -                | -                      | -                        |
| $\text{C}_s, 3$    | -                | -                | 0.2329<br>1.1142       | -                        |
| $\text{C}_{4v}, 5$ | -                | 0<br>0           | -                      | -                        |
| $\text{C}_{2v}, 6$ | -                | -                | -                      | 0.1146<br>0.4451         |
| $\text{C}_{2v}, 5$ | 0.0499<br>0.9156 | -                | 0<br>0                 | -                        |
| $\text{C}_{2v}, 4$ | -                | -                | -                      | 0<br>0                   |
| $\text{C}_{2v}, 2$ | -                | 0.1448<br>0.2998 | -                      | -                        |

\* Some isomers do not exist at higher levels of theory. For example, the  $\text{C}_s, 4$  structure of  $\text{Pt}_4\text{Zn}^-$  (from Figure 3, main text) rearranges into structure  $\text{C}_{2v}, 4$  when anything other than PW-DFT is used. For this reason, this species is not reported in Table S1. All other isomers found via GEGA were at least ~1 eV higher in energy than the most stable isomers that reported in this Table, and therefore they were considered not competitive and not of further interest.

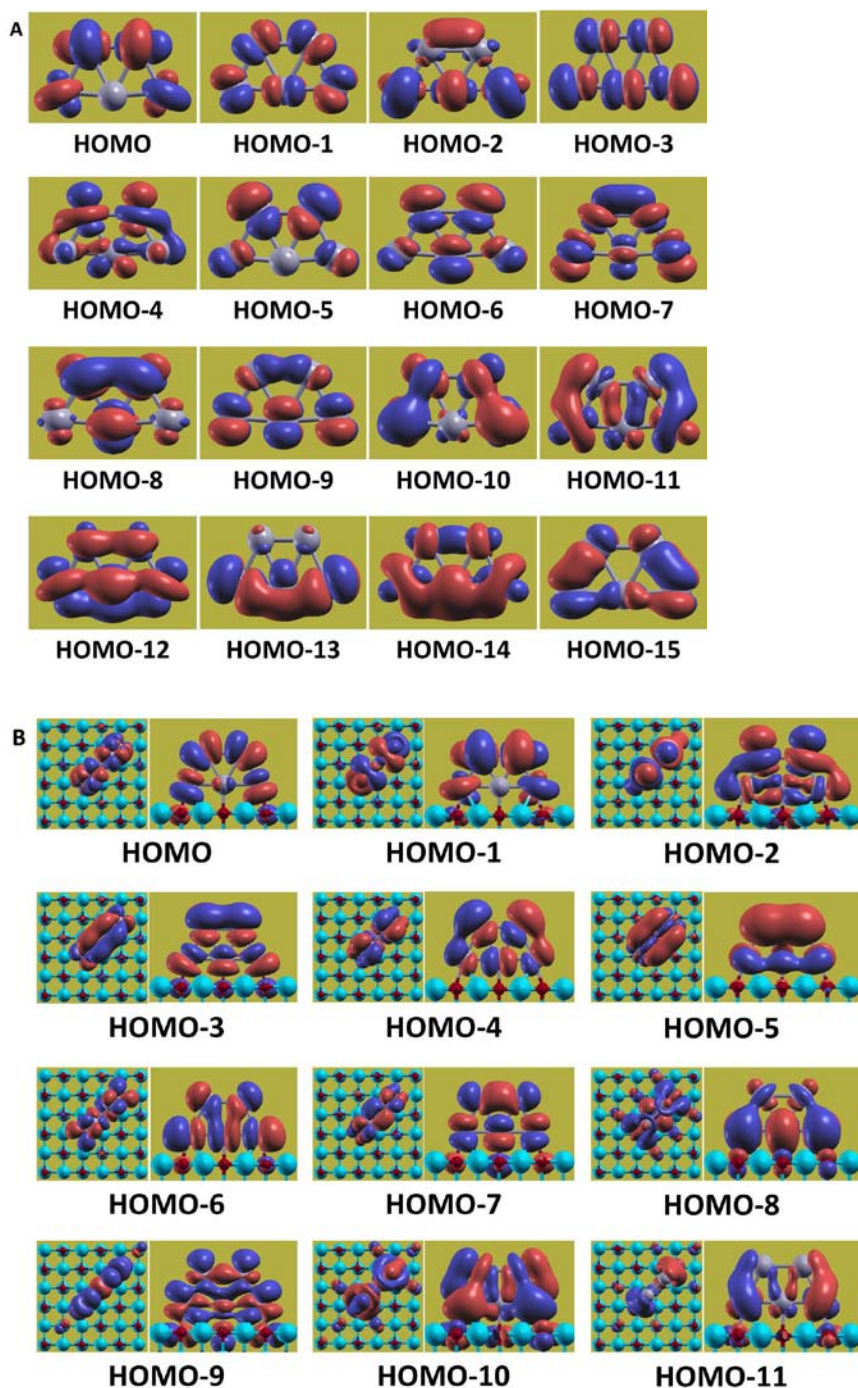

**Figure S2.** Valence MOs of the  $\text{Pt}_5^-$  cluster in the gas phase (A) and on  $\text{MgO}(100)$  (B) – top and side views are shown. The two sets of MOs are strikingly similar, indicating that the surface does not strongly disrupt in the intra-cluster bonding.

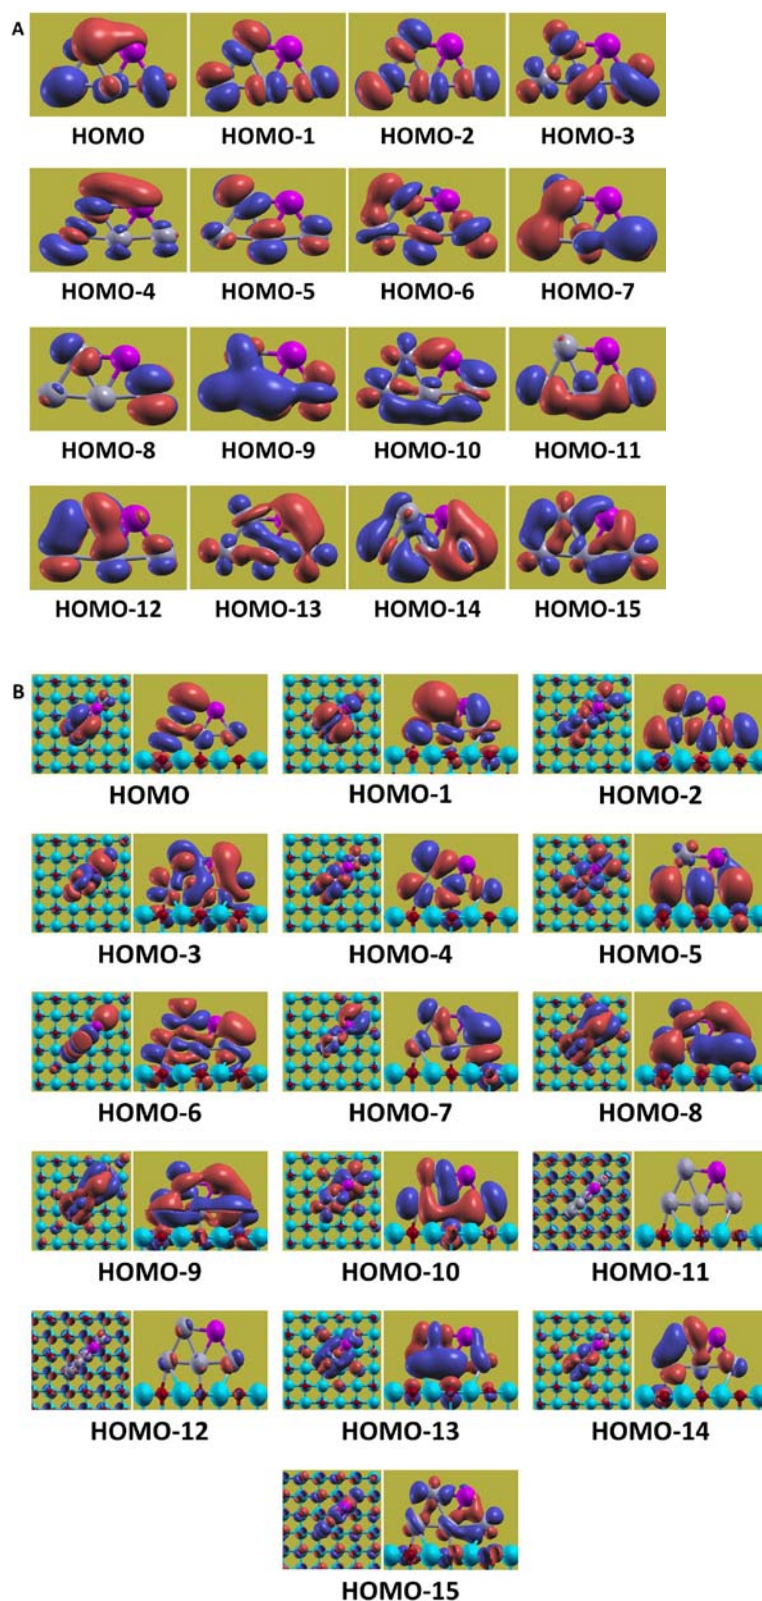

**Figure S3.** Valence MOs of the  $\text{Pt}_4\text{Zn}^-$  cluster in the gas phase (A) and on  $\text{MgO}(100)$  (B) – top and side views are shown. Again the two sets of MOs show a strong resemblance, indicating that the surface minimally interferes with intra-cluster bonding.

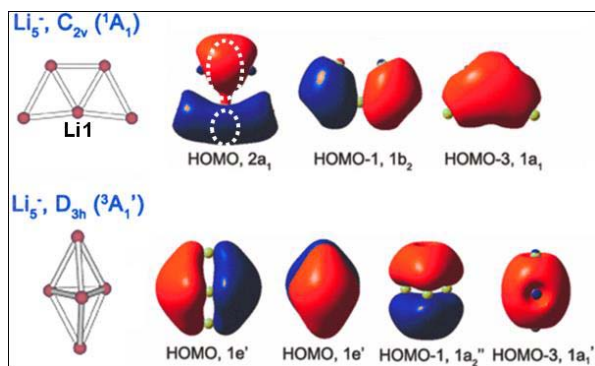

**Figure S4.** Two of the lowest energy isomers of  $\text{Li}_5^-$  and their valence MOs. The contribution of the 2p-AO in the flat cluster is outlined with the white dotted line (see refs. 60, 61, main text).
